# Supplementary material for: Cell–Fibronectin Interactions and Actomyosin Contractility Regulate the Segmentation Clock and Spatio-Temporal Somite Cleft Formation during Chick Embryo Somitogenesis
Source: MDPI journal article supplement (doi:10.3390/cells11132003), 2022-06-22
Supplement: s1 [file s1]

**Table S1: Data from the analysis of *hairy1* expression relating to the experiments of Figure 7.** Data from the analysis of explant pairs cultured for the designated times. Columns represent replicates for each of the periods tested and each treatment. diff – different.; nd – not done.

| Number of <i>hairy1</i> expression stripes formed during culture |   |   |   |    |    |    | Average    |
|------------------------------------------------------------------|---|---|---|----|----|----|------------|
| <b>6 hours + 0 minutes</b>                                       |   |   |   |    |    |    |            |
| DMSO                                                             | 4 | 4 | 4 | nd | nd | nd | <b>4.0</b> |
| DMSO + 0 min                                                     | 4 | 4 | 4 | nd | nd | nd | <b>4.0</b> |
| Blebb                                                            | 3 | 3 | 3 | 3  | nd | nd | <b>3.0</b> |
| Blebb + 0 min                                                    | 3 | 3 | 3 | 3  | nd | nd | <b>3.0</b> |
| <b>6 hours + 60 minutes</b>                                      |   |   |   |    |    |    |            |
| DMSO                                                             | 4 | 4 | 4 | 4  | 4  | nd | <b>4.0</b> |
| DMSO + 60 min                                                    | 5 | 5 | 5 | 4  | 4  | nd | <b>4.6</b> |
| Blebb                                                            | 3 | 3 | 3 | 3  | 2  | nd | <b>2.8</b> |
| Blebb +6 0 min                                                   | 4 | 3 | 3 | 3  | 3  | nd | <b>3.2</b> |
| <b>6 hours + 90 minutes</b>                                      |   |   |   |    |    |    |            |
| DMSO                                                             | 4 | 4 | 4 | 4  | 5  | nd | <b>4.2</b> |
| DMSO + 90 min                                                    | 5 | 5 | 5 | 5  | 6  | nd | <b>5.2</b> |
| Blebb                                                            | 3 | 2 | 3 | 4  | nd | nd | <b>3.0</b> |
| Blebb + 90 min                                                   | 3 | 3 | 4 | 4  | nd | nd | <b>3.5</b> |
| <b>6 hours + 120 minutes</b>                                     |   |   |   |    |    |    |            |
| DMSO                                                             | 4 | 4 | 4 | nd | nd | nd | <b>4.0</b> |
| DMSO +120 min                                                    | 5 | 5 | 5 | nd | nd | nd | <b>5.0</b> |
| Blebb                                                            | 3 | 3 | 3 | 3  | 3  | 3  | <b>3.0</b> |
| Blebb + 120 min                                                  | 4 | 4 | 4 | 4  | 4  | 3  | <b>3.8</b> |

| Number of somitic structures formed in culture* |   |   |   |    |    |    | Average    |
|-------------------------------------------------|---|---|---|----|----|----|------------|
| <b>6 hours + 0 minutes</b>                      |   |   |   |    |    |    |            |
| DMSO                                            | 4 | 4 | 4 | nd | nd | nd | <b>4.0</b> |
| DMSO + 0 min                                    | 4 | 4 | 4 | nd | nd | nd | <b>4.0</b> |
| Blebb                                           | 1 | 1 | 0 | 0  | nd | nd | <b>0.5</b> |
| Blebb + 0 min                                   | 1 | 1 | 1 | 1  | nd | nd | <b>1.0</b> |
| <b>6 hours + 60 minutes</b>                     |   |   |   |    |    |    |            |
| DMSO                                            | 4 | 4 | 4 | 4  | 4  | nd | <b>4.0</b> |
| DMSO + 60 min                                   | 5 | 5 | 5 | 4  | 4  | nd | <b>4.6</b> |
| Blebb                                           | 2 | 1 | 0 | 1  | 1  | nd | <b>1.0</b> |
| Blebb +6 0 min                                  | 1 | 2 | 0 | 2  | 1  | nd | <b>1.2</b> |
| <b>6 hours + 90 minutes</b>                     |   |   |   |    |    |    |            |
| DMSO                                            | 4 | 4 | 4 | 4  | 5  | nd | <b>4.2</b> |
| DMSO + 90 min                                   | 5 | 5 | 5 | 5  | 6  | nd | <b>5.2</b> |
| Blebb                                           | 1 | 0 | 0 | 0  | nd | nd | <b>0.3</b> |
| Blebb + 90 min                                  | 1 | 1 | 0 | 0  | nd | nd | <b>0.5</b> |
| <b>6 hours + 120 minutes</b>                    |   |   |   |    |    |    |            |
| DMSO                                            | 4 | 4 | 4 | nd | nd | nd | <b>4.0</b> |
| DMSO +120 min                                   | 5 | 5 | 5 | nd | nd | nd | <b>5.0</b> |
| Blebb                                           | 0 | 1 | 1 | 0  | 1  | 1  | <b>0.7</b> |
| Blebb + 120 min                                 | 1 | 1 | 1 | 0  | 1  | 1  | <b>0.8</b> |

\*Somitic structures in Blebbistatin-cultured explants are always ill-defined.

| <b>Hairy1 expression pattern of the two explant pairs after culture</b> |           |           |           |           |           |           | <b>Conclusion</b> |
|-------------------------------------------------------------------------|-----------|-----------|-----------|-----------|-----------|-----------|-------------------|
| <b>6 hours + 0 minutes</b>                                              |           |           |           |           |           |           |                   |
| DMSO                                                                    | Same      | Same      | Same      | nd        | nd        | nd        | <b>100% same</b>  |
| DMSO + 0 min                                                            |           |           |           |           |           |           |                   |
| Blebb                                                                   | Same      | Same      | Same      | Same      | nd        | nd        | <b>100% same</b>  |
| Blebb + 0 min                                                           |           |           |           |           |           |           |                   |
| <b>6 hours + 60 minutes</b>                                             |           |           |           |           |           |           |                   |
| DMSO                                                                    | Different | Different | Different | Different | Different | nd        | <b>100% diff</b>  |
| DMSO + 60 min                                                           |           |           |           |           |           |           |                   |
| Blebb                                                                   | Different | Different | Different | Different | Different | nd        | <b>100% diff</b>  |
| Blebb + 60 min                                                          |           |           |           |           |           |           |                   |
| <b>6 hours + 90 minutes</b>                                             |           |           |           |           |           |           |                   |
| DMSO                                                                    | Same      | Same      | Same      | Same      | Same      | nd        | <b>100% same</b>  |
| DMSO + 90 min                                                           |           |           |           |           |           |           |                   |
| Blebb                                                                   | Different | Different | Different | Different | nd        | nd        | <b>100% diff</b>  |
| Blebb + 90 min                                                          |           |           |           |           |           |           |                   |
| <b>6 hours + 120 minutes</b>                                            |           |           |           |           |           |           |                   |
| DMSO                                                                    | Different | Different | Different | nd        | nd        | nd        | <b>100% diff</b>  |
| DMSO +120 min                                                           |           |           |           |           |           |           |                   |
| Blebb                                                                   | Same      | Same      | Same      | Same      | Same      | Different | <b>83% same</b>   |
| Blebb + 120 min                                                         |           |           |           |           |           |           |                   |
