# Supplementary material for: Cell–Fibronectin Interactions and Actomyosin Contractility Regulate the Segmentation Clock and Spatio-Temporal Somite Cleft Formation during Chick Embryo Somitogenesis
Source: Cells. 2022 Jun 22;11(13):2003. doi: 10.3390/cells11132003 (PMC9266262; doi:10.3390/cells11132003)
Supplement: Supplementary file 1 [file cells-11-02003-s001.zip]

Archive with 8 entries (8 files):
- cells-1769568_Supplementary_Materials_Final/cells-1769568_SupplementaryFigures_Revised PGA.pdf
- cells-1769568_Supplementary_Materials_Final/cells-1769568_Table S1_Revised.pdf
- cells-1769568_Supplementary_Materials_Final/Figure_S1.tif
- cells-1769568_Supplementary_Materials_Final/Figure_S2.tif
- cells-1769568_Supplementary_Materials_Final/Figure_S3.tif
- cells-1769568_Supplementary_Materials_Final/Figure_S4.tif
- cells-1769568_Supplementary_Materials_Final/Figure_S5.tif
- cells-1769568_Supplementary_Materials_Final/Figure_S6.tif
